# Supplementary material for: Investigation of In-Vitro Antioxidant and Electrochemical Activities of Isolated Compounds from Salvia chamelaeagnea P.J.Bergius Extract
Source: PubMed Central journal article supplement (PMC6523530; doi:10.3390/antiox8040098), 2019-04-12

# Investigation of in-vitro antioxidant and electrochemical activities of isolated compounds from *Salvia chamelaeagnea* P.J.Bergius extract

Ninon G.E.R. Etsassala<sup>1</sup>, Adewale O. Adeloje<sup>2</sup>, Ali El-Halawany<sup>3</sup>, Ahmed A. Hussein<sup>2,\*</sup> and Emmanuel I. Iwuoha<sup>1</sup>

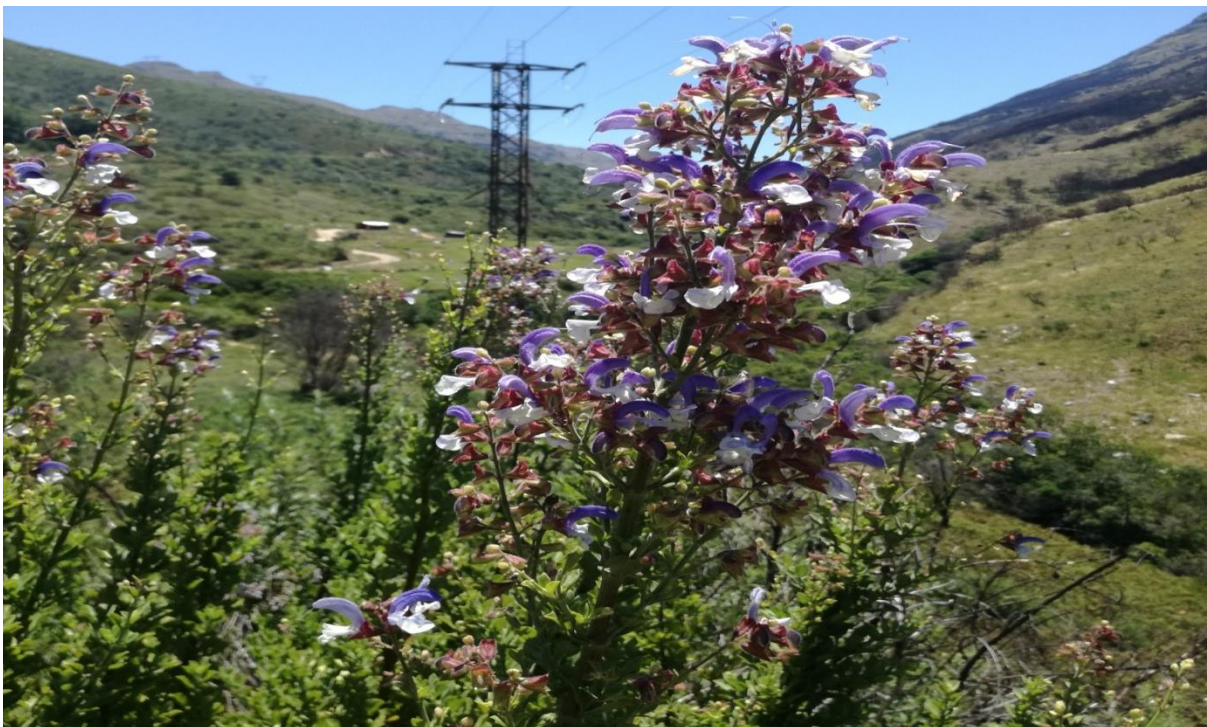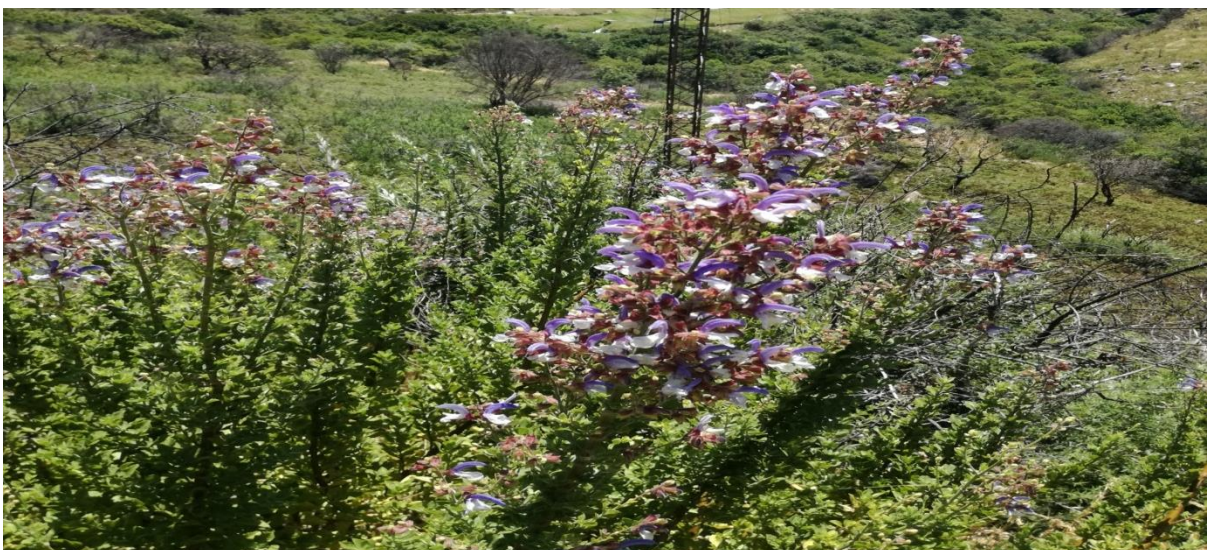

Supplement: antioxidants-08-00098-s001.pdf [file antioxidants-08-00098-s001.pdf]
